# Supplementary material for: Understanding Barriers to the Access to Healthcare and Rehabilitation Services: A Qualitative Study with Mothers or Female Caregivers of Children with a Disability in Indonesia
Source: MDPI journal article supplement (doi:10.3390/ijerph182111546), 2021-11-03
Supplement: s1 [file s1]

Table 1 Consolidated criteria for reporting qualitative studies (COREQ): 32-item checklist

| No                                             | Item                                     | Guide questions/description                                                                                                                              | Page |
|------------------------------------------------|------------------------------------------|----------------------------------------------------------------------------------------------------------------------------------------------------------|------|
| <b>Domain 1: Research team and reflexivity</b> |                                          |                                                                                                                                                          |      |
| Personal Characteristics                       |                                          |                                                                                                                                                          |      |
| 1.                                             | Interviewer/facilitator                  | Which author/s conducted the interview or focus group?                                                                                                   | 4    |
| 2                                              | Credentials                              | What were the researcher's credentials? E.g. PhD, MD                                                                                                     | 4    |
| 3                                              | Occupation                               | What was their occupation at the time of the study?                                                                                                      | 4    |
| 4                                              | Gender                                   | Was the researcher male or female?                                                                                                                       | 4    |
| 5                                              | Experience and training                  | What experience or training did the researcher have?                                                                                                     | 4    |
| Relationship with participants                 |                                          |                                                                                                                                                          |      |
| 6                                              | Relationship established                 | Was a relationship established prior to study commencement?                                                                                              | 4    |
| 7                                              | Participant knowledge of the interviewer | What did the participants know about the researcher? e.g. personal goals, reasons for doing the research                                                 | 4    |
| 8                                              | Interviewer characteristics              | What characteristics were reported about the interviewer/facilitator? e.g. Bias, assumptions, reasons and interests in the research topic                | 4    |
| <b>Domain 2: study design</b>                  |                                          |                                                                                                                                                          |      |
| Theoretical framework                          |                                          |                                                                                                                                                          |      |
| 9                                              | Methodological orientation and Theory    | What methodological orientation was stated to underpin the study? e.g. grounded theory, discourse analysis, ethnography, phenomenology, content analysis | 2-3  |
| Participant selection                          |                                          |                                                                                                                                                          |      |
| 10                                             | Sampling                                 | How were participants selected? e.g. purposive, convenience, consecutive, snowball                                                                       | 4    |
| 11                                             | Method of approach                       | How were participants approached? e.g. face-to-face, telephone, mail, email                                                                              | 4    |
| 12                                             | Sample size                              | How many participants were in the study?                                                                                                                 | 4    |
| 13                                             | Non-participation                        | How many people refused to participate or dropped out? Reasons?                                                                                          | 4    |
| Setting                                        |                                          |                                                                                                                                                          |      |
| 14                                             | Setting of data collection               | Where was the data collected? e.g. home, clinic, workplace                                                                                               | 4    |
| 15                                             | Presence of non-participants             | Was anyone else present besides the participants and researchers?                                                                                        | 4    |
| 16                                             | Description of sample                    | What are the important characteristics of the sample? e.g. demographic data, date                                                                        | 5-6  |
| Data collection                                |                                          |                                                                                                                                                          |      |
| 17                                             | Interview guide                          | Were questions, prompts, guides provided by the authors? Was it pilot tested?                                                                            | 4    |
| 18                                             | Repeat interviews                        | Were repeat interviews carried out? If yes, how many?                                                                                                    | 4    |
| 19                                             | Audio/visual recording                   | Did the research use audio or visual recording to collect the data?                                                                                      | 5    |
| 20                                             | Field notes                              | Were field notes made during and/or after the interview or focus group?                                                                                  | 5    |
| 21                                             | Duration                                 | What was the duration of the interviews or focus group?                                                                                                  | 4    |
| 22                                             | Data saturation                          | Was data saturation discussed?                                                                                                                           |      |
| 23                                             | Transcripts returned                     | Were transcripts returned to participants for comment and/or correction?                                                                                 | 4    |

| Domain 3: analysis and findings |                                |                                                                                                                                   |       |
|---------------------------------|--------------------------------|-----------------------------------------------------------------------------------------------------------------------------------|-------|
| Data analysis                   |                                |                                                                                                                                   |       |
| 24                              | Number of data coders          | How many data coders coded the data?                                                                                              | 4     |
| 25                              | Description of the coding tree | Did authors provide a description of the coding tree?                                                                             | 6-12  |
| 26                              | Derivation of themes           | Were themes identified in advance or derived from the data?                                                                       | 5     |
| 27                              | Software                       | What software, if applicable, was used to manage the data?                                                                        | 4     |
| 28                              | Participant checking           | Did participants provide feedback on the findings?                                                                                | 4     |
| Reporting                       |                                |                                                                                                                                   |       |
| 29                              | Quotations presented           | Were participant quotations presented to illustrate the themes / findings? Was each quotation identified? e.g. participant number | 6-12  |
| 30                              | Data and findings consistent   | Was there consistency between the data presented and the findings?                                                                | 6-12  |
| 31                              | Clarity of major themes        | Were major themes clearly presented in the findings?                                                                              | 6-12  |
| 32                              | Clarity of minor themes        | Is there a description of diverse cases or discussion of minor themes?                                                            | 12-14 |
